# Supplementary material for: Improved ion adsorption capacities and diffusion dynamics in surface anchored MoS2⊥Mo4/3B2 and MoS2⊥Mo4/3B2O2 heterostructures as anodes for alkaline metal-ion batteries
Source: Royal Society of Chemistry journal article supplement (doi:10.1039/d3cp05035a), 2023-11-27
Supplement: d3cp05035a1.pdf [file d3cp05035a1.pdf]

## Supplementary Information

### **Improved ion adsorption capacities and diffusion dynamics in surface anchored $\text{MoS}_2 \perp \text{Mo}_{4/3}\text{B}_2$ and $\text{MoS}_2 \perp \text{Mo}_{4/3}\text{B}_2\text{O}_2$ heterostructures as the anodes for alkaline metal ion batteries**

**Zifeng Song<sup>1</sup>, Haoliang Liu<sup>1</sup>, Baiyi Chen<sup>2</sup>, Qin Jiang<sup>1</sup>, Fengxiang Sui<sup>1</sup>, Kai Wu<sup>1</sup>, Yonghong Cheng<sup>1</sup>, Bing Xiao<sup>1\*</sup>**

1.State Key Laboratory of Electrical Insulation and Power Equipment, School of Electrical Engineering, Xi'an Jiaotong University, Xi'an 710049, China

2.State Grid Hebei Economic Research Institute, Shijiazhuang 050021, Hebei Province, China

\*Corresponding Author: [bingxiao84@xjtu.edu.cn](mailto:bingxiao84@xjtu.edu.cn)

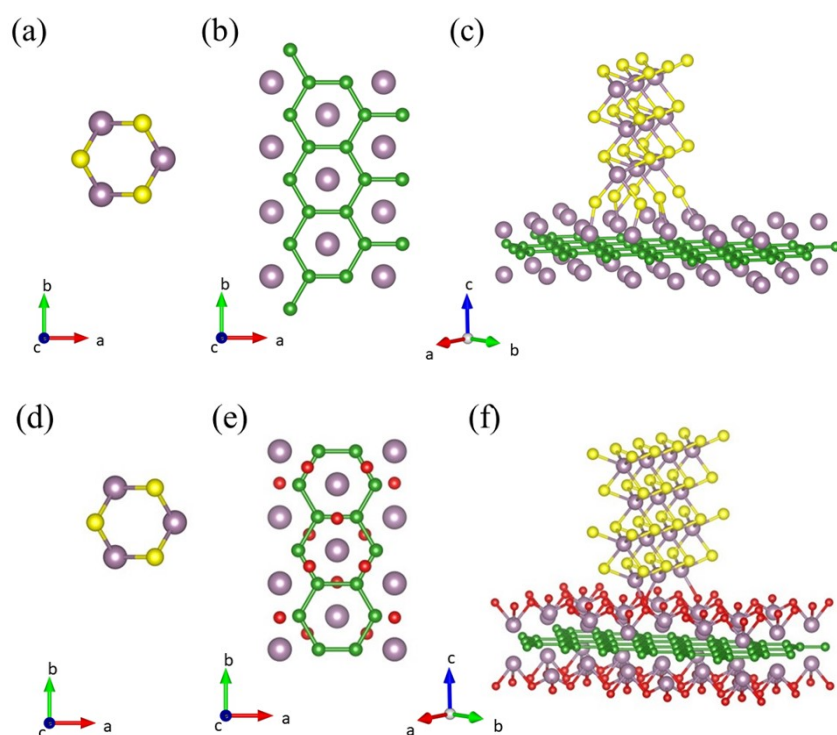

Fig S1 Atomic structures of heterostructures and their constituting components: (a) and (d) The hexagonal structural unit of  $\text{MoS}_2$  in the orthogonal unit cell; (b) Atomic structures of  $\text{Mo}_{4/3}\text{B}_2$  in the orthogonal cell; (c) Initial atomic model of  $\text{MoS}_2 \perp \text{Mo}_{4/3}\text{B}_2$  heterostructure; (e) Atomic structure of  $\text{Mo}_{4/3}\text{B}_2\text{O}_2$  in an orthogonal cell; (f) Initial atomic structure of  $\text{MoS}_2 \perp \text{Mo}_{4/3}\text{B}_2\text{O}_2$  heterostructure.

(a)

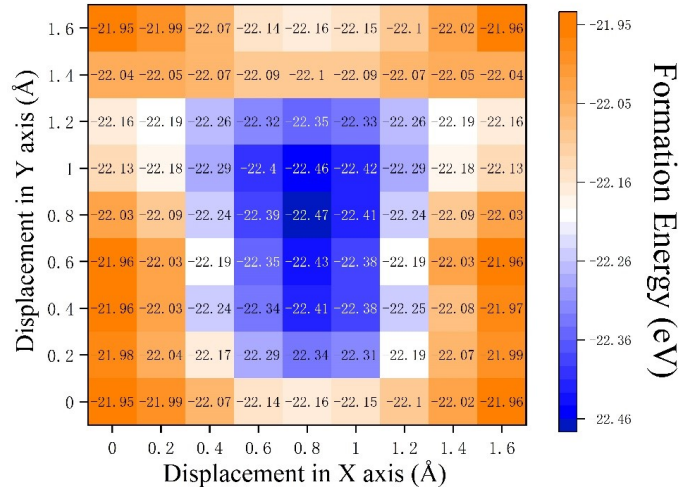

(b)

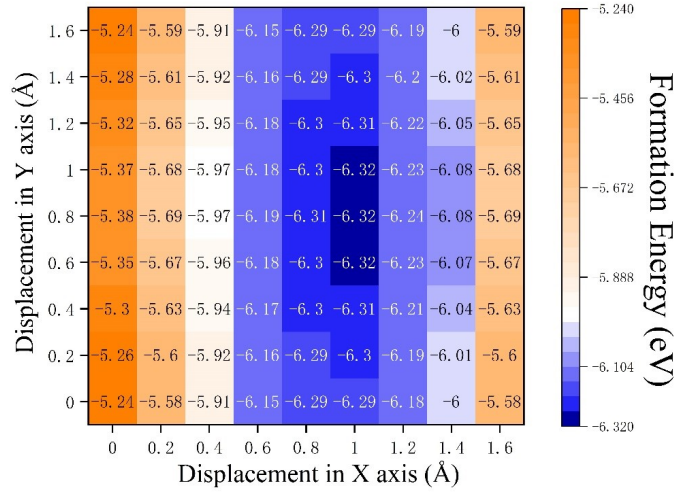

Fig S2 2-D heatmaps of the binding energies for anchoring the MoS<sub>2</sub> nanoflake on the Boridene substrate at various locations. (a) MoS<sub>2</sub> ⊥ Mo<sub>4/3</sub>B<sub>2</sub>; (b) MoS<sub>2</sub> ⊥ Mo<sub>4/3</sub>B<sub>2</sub>O<sub>2</sub>.

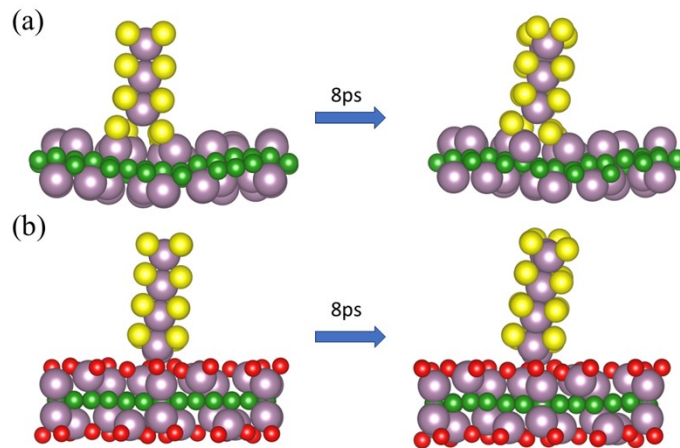

Fig S3 The atomic structures of heterostructures simulated by FPMD at 300K within the NVT ensemble: (a) MoS<sub>2</sub> ⊥ Mo<sub>4/3</sub>B<sub>2</sub>; (b) MoS<sub>2</sub> ⊥ Mo<sub>4/3</sub>B<sub>2</sub>O<sub>2</sub>.

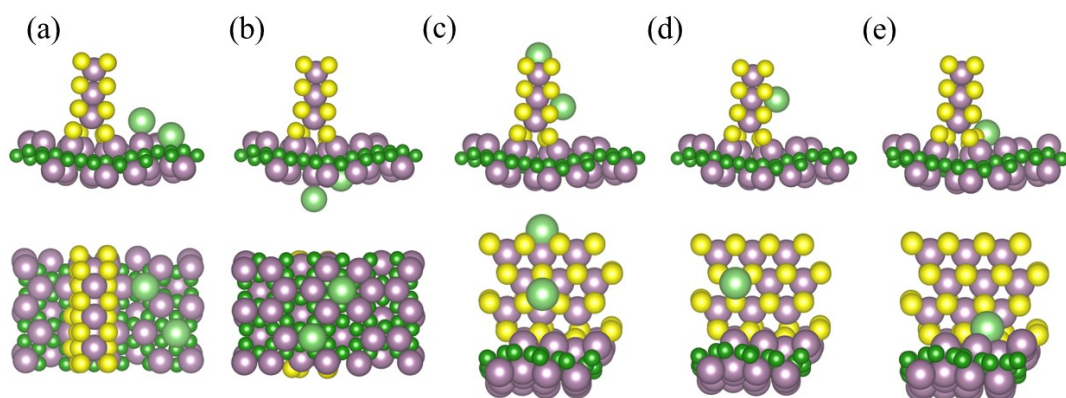

Fig S4 Relaxed atomic structures for the adsorption of  $\text{Li}^+$  at various adsorption sites on  $\text{MoS}_2 \perp \text{Mo}_{4/3}\text{B}_2$ :(a) Hb1 and Tb1 sites; (b) Hb2 and Tb2 sites; (c) Hm and Top sites; (c) Tm site; (d) In site.

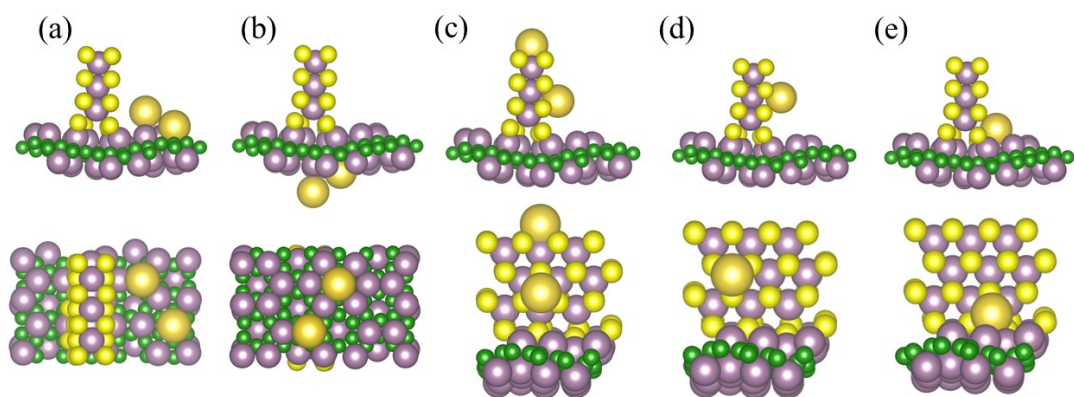

Fig S5 Relaxed atomic structures of the adsorption of  $\text{Na}^+$  at different adsorption sites on  $\text{MoS}_2 \perp \text{Mo}_{4/3}\text{B}_2$ :(a) Hb1 and Tb1 sites; (b) Hb2 and Tb2 sites; (c) Hm and Top sites; (c) Tm site; (d) In site.

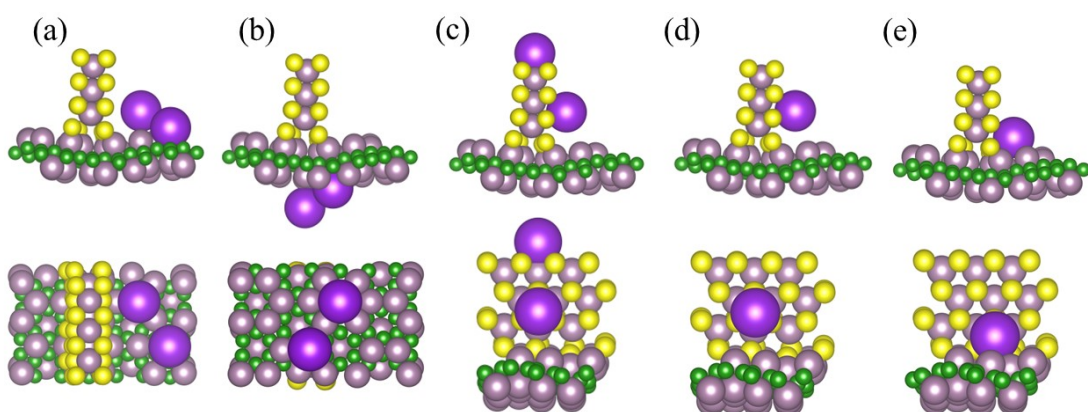

Fig S6 Relaxed atomic structures of the adsorption of  $\text{K}^+$  ion at various adsorption sites on  $\text{MoS}_2 \perp \text{Mo}_{4/3}\text{B}_2$ :(a) Hb1 and Tb1 sites; (b) Hb2 and Tb2 sites; (c) Hm and Top sites; (c) Tm site; (d) In site.



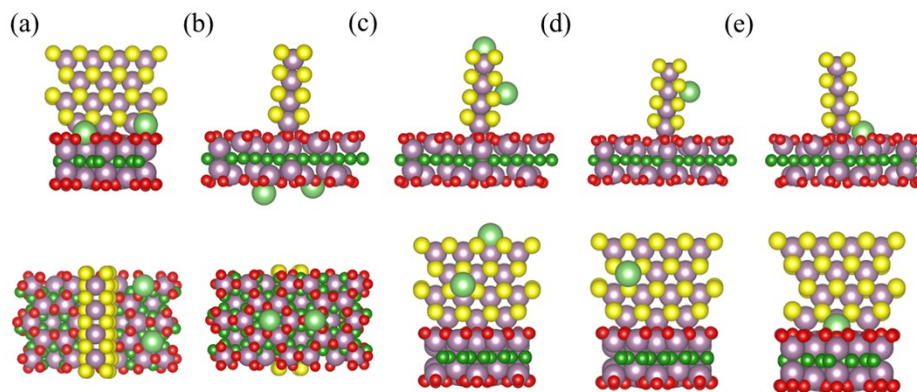

Fig S7 Relaxed atomic structures of the adsorption of  $\text{Li}^+$  at various adsorption sites on  $\text{MoS}_2 \perp \text{Mo}_{4/3}\text{B}_2\text{O}_2$ :(a) Hb1 and Tb1 sites; (b) Hb2 and Tb2 sites; (c) Hm and Top sites; (c) Tm site; (d) In site.

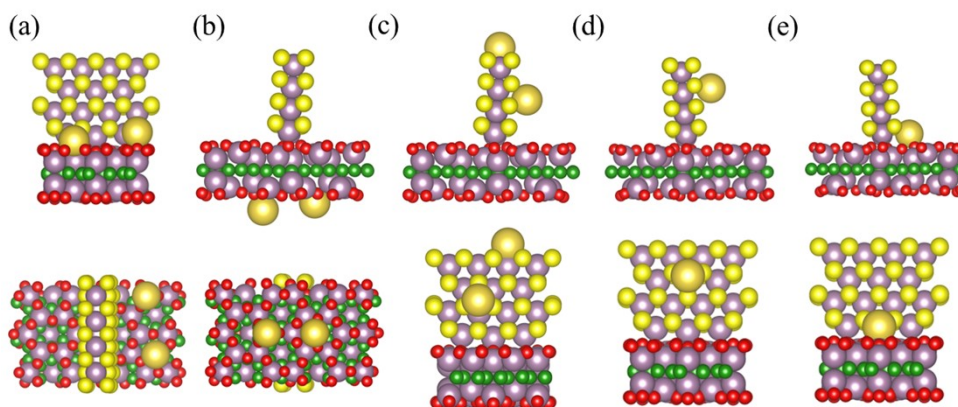

Fig S8 The Optimized atomic structures for adsorbing the  $\text{Na}^+$  at different adsorption sites on  $\text{MoS}_2 \perp \text{Mo}_{4/3}\text{B}_2\text{O}_2$ :(a) Hb1 and Tb1 sites; (b) Hb2 and Tb2 sites; (c) Hm and Top sites; (c) Tm site; (d) In site.

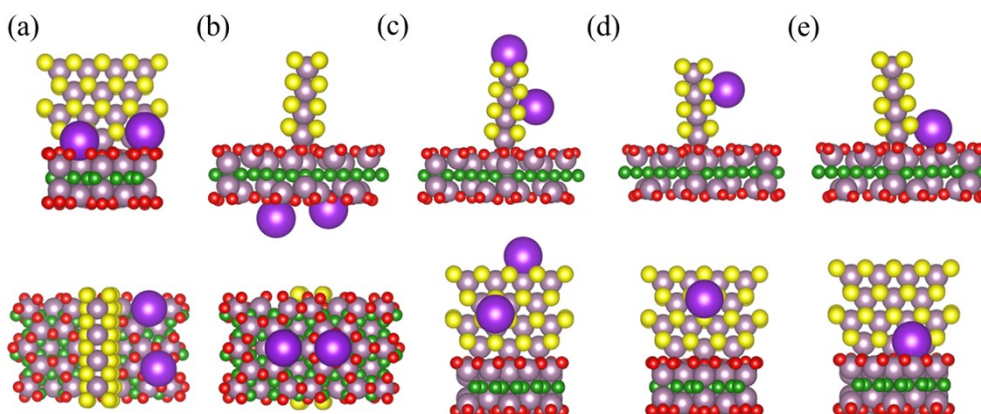

Fig S9 The optimized atomic structures of the adsorption of  $\text{K}^+$  at various adsorption sites on  $\text{MoS}_2 \perp \text{Mo}_{4/3}\text{B}_2\text{O}_2$ : (a) Hb1 and Tb1 sites; (b) Hb2 and Tb2 sites; (c) Hm and Top sites; (c) Tm site; (d) In site.

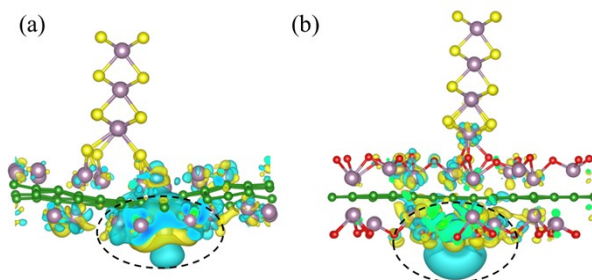

Fig S10 The 3-D contour plots of charge density difference distributions for the adsorption of a single  $\text{Li}^+$  ion at Hb2 site on  $\text{MoS}_2 \perp \text{Mo}_{4/3}\text{B}_2$  and  $\text{MoS}_2 \perp \text{Mo}_{4/3}\text{B}_2\text{O}_2$  heterostructures.

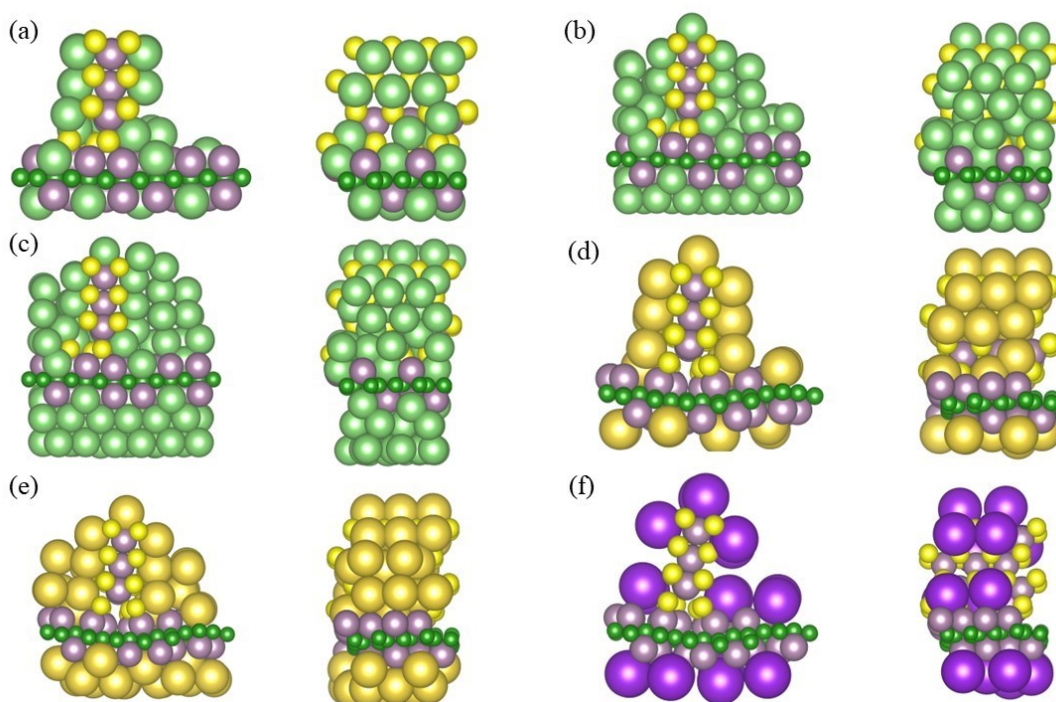

Fig S11 Fully relaxed atomic structures for the formation of full stable adsorbate layers on  $\text{MoS}_2 \perp \text{Mo}_{4/3}\text{B}_2$  hybrid: (a) the first full stable layer of  $\text{Li}^+$ ; (b) the second full stable layer of  $\text{Li}^+$ ; (c) saturation with  $\text{Li}^+$ ; (d) the first full stable layer of  $\text{Na}^+$ ; (e) the second full stable layer of  $\text{Na}^+$ ; (f) the first full stable layer of  $\text{K}^+$ .

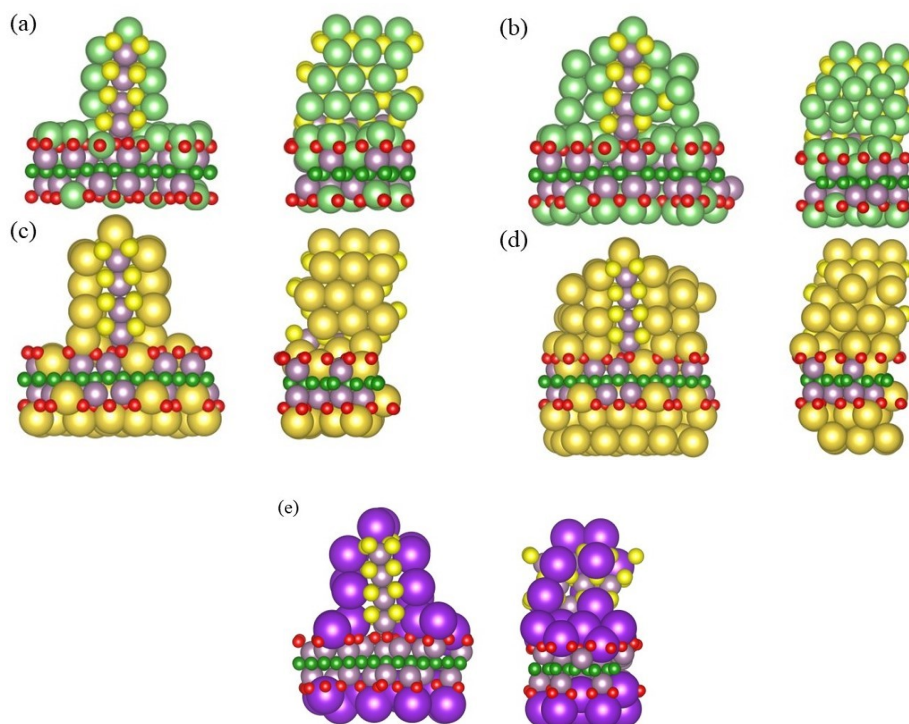

Fig S12 The optimized atomic structures for the formation of full stable adsorption layers on MoS<sub>2</sub> ⊥ Mo<sub>4/3</sub>B<sub>2</sub>O<sub>2</sub> hybrid: (a) the first full stable layer of Li<sup>+</sup>; (b) fully saturated with Li<sup>+</sup>; (c) the first full stable layer of Na<sup>+</sup>; (d) the second full stable layer of Na<sup>+</sup>; (e) the full stable layer of K<sup>+</sup>.

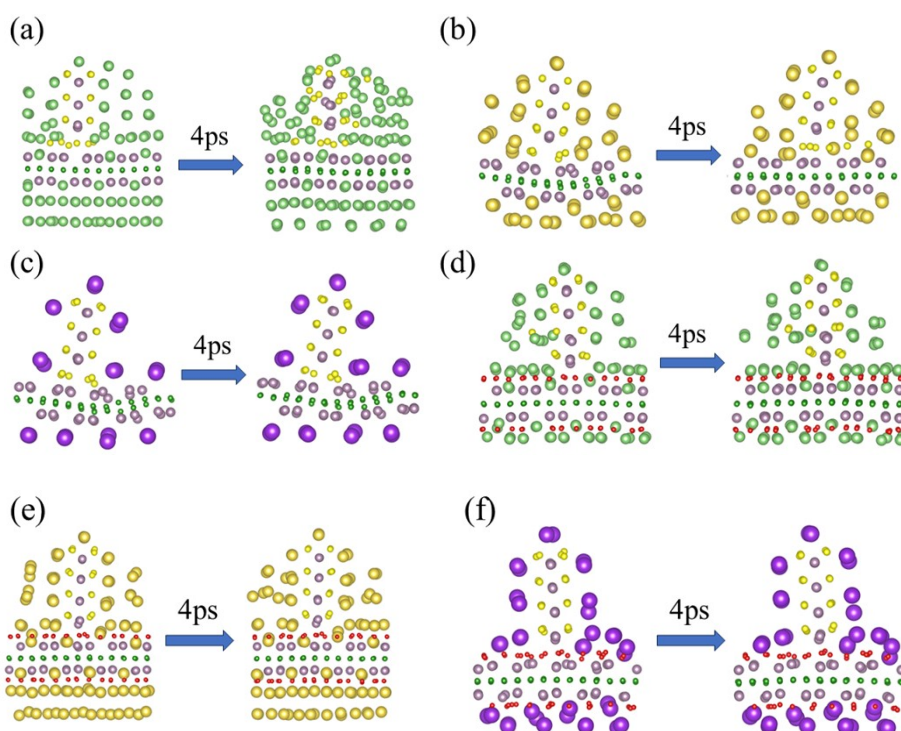

Fig S13 Structural evolutions of alkaline metal ion fully saturated heterostructures simulated by FPMD at 300 K within the NVT ensemble: (a) Li-MoS<sub>2</sub> ⊥ Mo<sub>4/3</sub>B<sub>2</sub>; (b) Na-MoS<sub>2</sub> ⊥ Mo<sub>4/3</sub>B<sub>2</sub>; (c) K-MoS<sub>2</sub> ⊥ Mo<sub>4/3</sub>B<sub>2</sub>; (d) Li-MoS<sub>2</sub> ⊥ Mo<sub>4/3</sub>B<sub>2</sub>O<sub>2</sub>; (e) Na-MoS<sub>2</sub> ⊥ Mo<sub>4/3</sub>B<sub>2</sub>O<sub>2</sub>; (f) K-MoS<sub>2</sub> ⊥ Mo<sub>4/3</sub>B<sub>2</sub>O<sub>2</sub>.



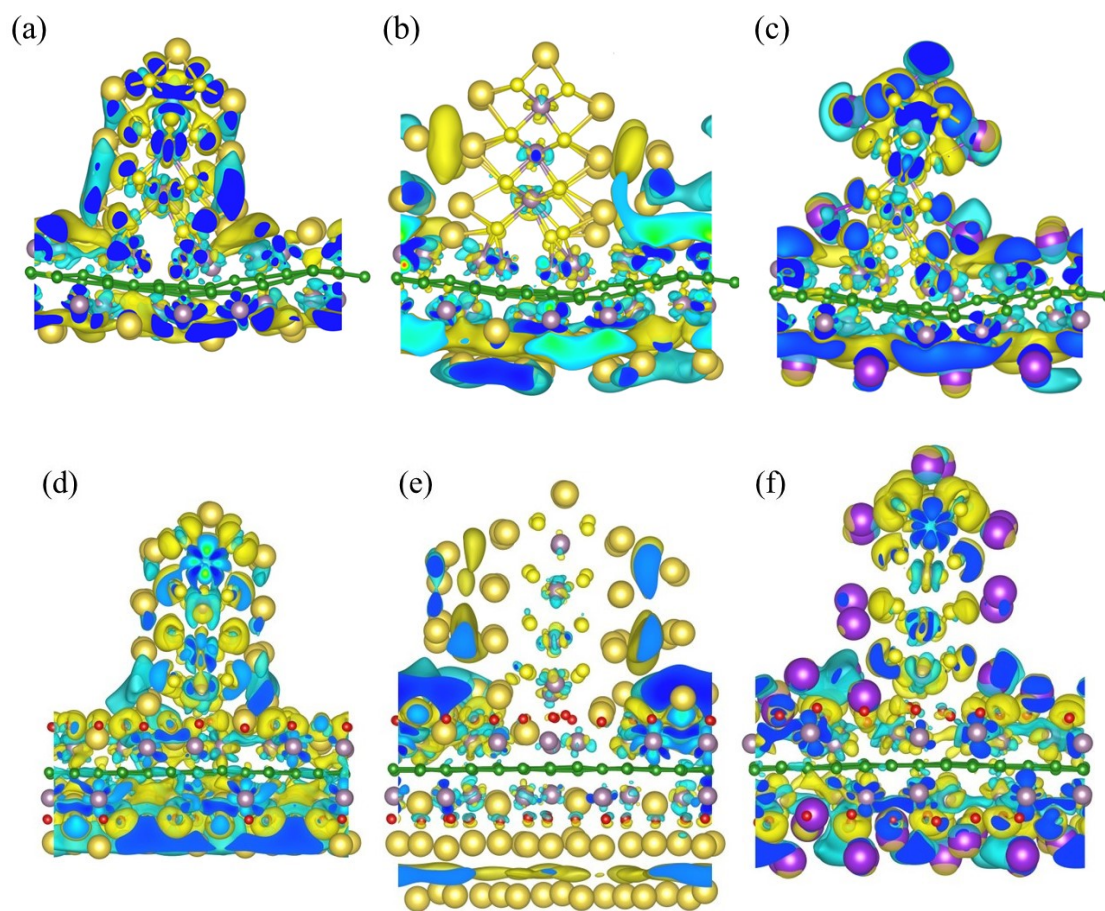

Fig S14 3D-contour plots of the charge density difference at different stages in a multi-layer adsorption process for  $\text{MoS}_2 \perp \text{Mo}_{4/3}\text{B}_2$ : (a) the first full stable layer of  $\text{Na}^+(0.0020 \text{ e } \text{\AA}^{-3})$ ; (b) the second full stable layer of  $\text{Na}^+(0.001 \text{ e } \text{\AA}^{-3})$ ; (c) the first full stable layer of  $\text{K}^+(0.0012 \text{ e } \text{\AA}^{-3})$ . For  $\text{MoS}_2 \perp \text{Mo}_{4/3}\text{B}_2\text{O}_2$ : (d) the first full stable layer of  $\text{Na}^+(0.004 \text{ e } \text{\AA}^{-3})$ ; (e) the second full stable layer of  $\text{Na}^+(0.0012 \text{ e } \text{\AA}^{-3})$ ; (f) the first full stable layer of  $\text{K}^+(0.003 \text{ e } \text{\AA}^{-3})$ .



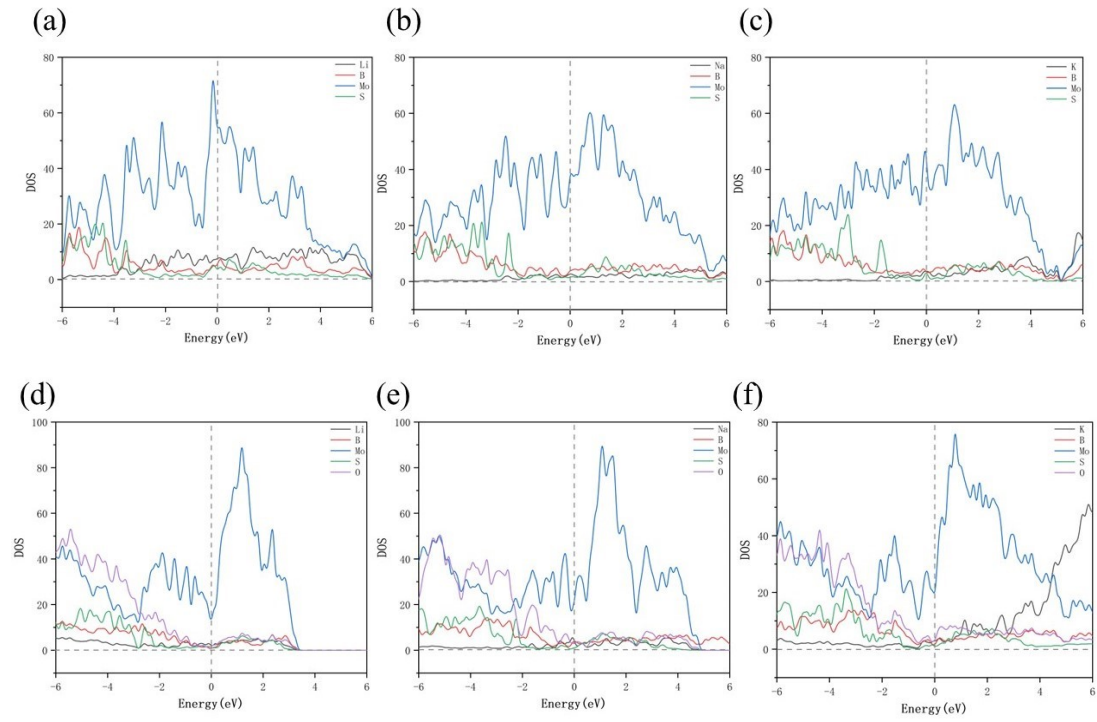

Fig S15 The predicted electronic density of states (DOS) for (a):Li-  $\text{MoS}_2 \perp \text{Mo}_{4/3}\text{B}_2$ ; (b):Na-  $\text{MoS}_2 \perp \text{Mo}_{4/3}\text{B}_2$ ; (c):K-  $\text{MoS}_2 \perp \text{Mo}_{4/3}\text{B}_2$ ; (d):Li-  $\text{MoS}_2 \perp \text{Mo}_{4/3}\text{B}_2\text{O}_2$ ; (e):Na-  $\text{MoS}_2 \perp \text{Mo}_{4/3}\text{B}_2\text{O}_2$ ; (f):K-  $\text{MoS}_2 \perp \text{Mo}_{4/3}\text{B}_2\text{O}_2$ .

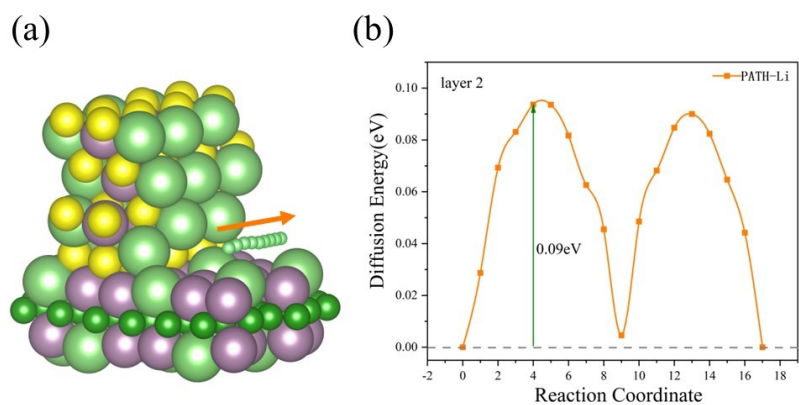

Fig S16 The favorable migration pathway and diffusion energy profile of Li<sup>+</sup> in the second full layer on MoS<sub>2</sub> ⊥ Mo<sub>4/3</sub>B<sub>2</sub>.

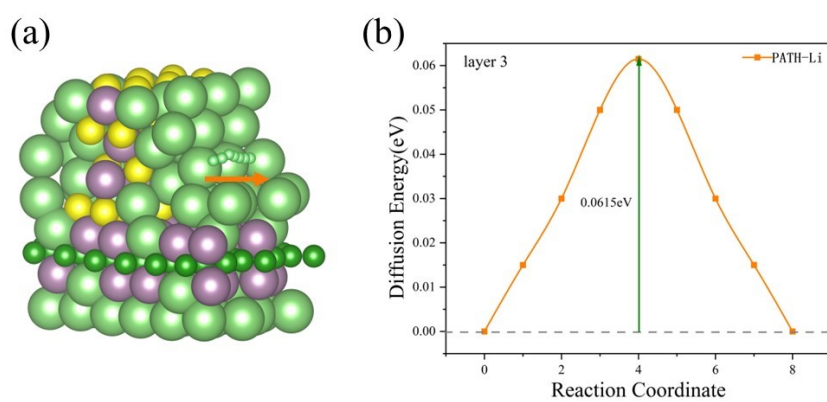

Fig S17 The favorable migration pathway and diffusion energy profile of Li<sup>+</sup> in the third full adsorption layer on MoS<sub>2</sub> ⊥ Mo<sub>4/3</sub>B<sub>2</sub>.

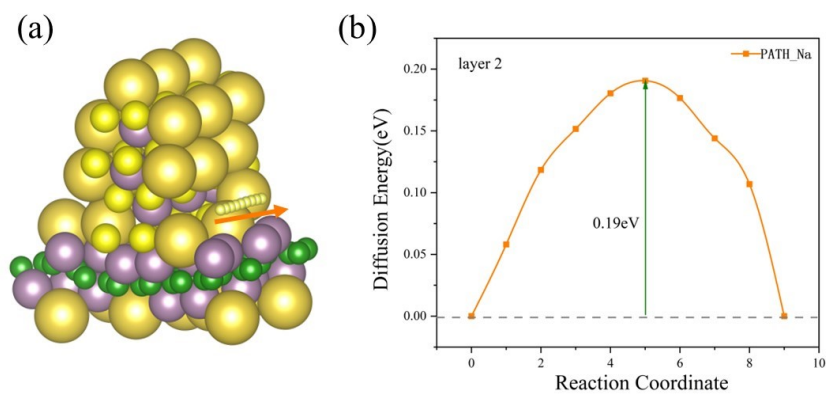

Fig S18 The favorable migration pathway and diffusion energy profile of Na<sup>+</sup> in the second full layer on MoS<sub>2</sub> ⊥ Mo<sub>4/3</sub>B<sub>2</sub>.

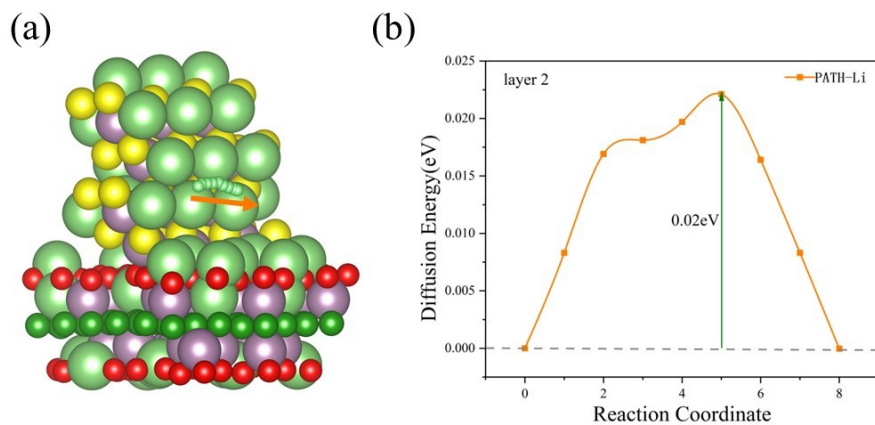

Fig S19 The favorable migration pathway and diffusion energy profile of  $\text{Li}^+$  in the second full layer on  $\text{MoS}_2 \perp \text{Mo}_{4/3}\text{B}_2\text{O}_2$ .

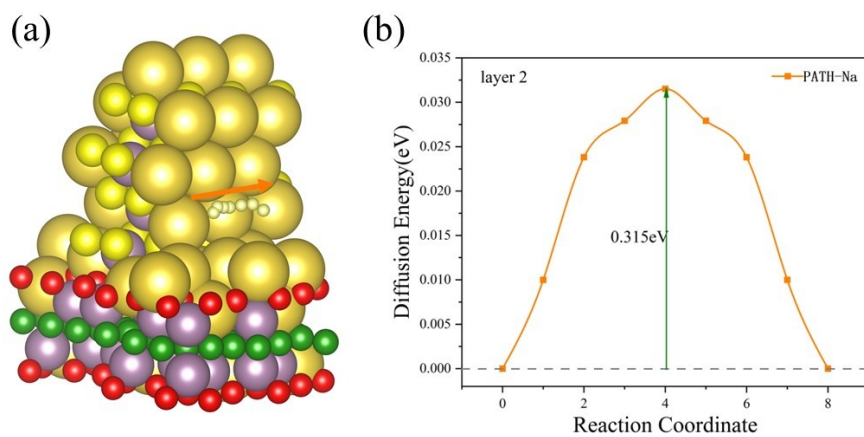

Fig S20 The favorable migration pathway and diffusion energy profile of  $\text{Na}^+$  ion in the second full layer on  $\text{MoS}_2 \perp \text{Mo}_{4/3}\text{B}_2\text{O}_2$ .

Table S1 Bader charge analysis of single alkaline metal ion-adsorbed structures of  $\text{MoS}_2 \perp \text{Mo}_{4/3}\text{B}_2$  and  $\text{MoS}_2 \perp \text{Mo}_{4/3}\text{B}_2\text{O}_2$  heterostructures.

| Site     |    | $\text{MoS}_2 \perp \text{Mo}_{4/3}\text{B}_2$ |      |       |      |       | $\text{MoS}_2 \perp \text{Mo}_{4/3}\text{B}_2\text{O}_2$ |      |      |       |      |       |
|----------|----|------------------------------------------------|------|-------|------|-------|----------------------------------------------------------|------|------|-------|------|-------|
|          |    | Mo(b)                                          | B    | Mo(m) | S    | X     | Mo(b)                                                    | B    | O    | Mo(m) | S    | X     |
| $T_{b1}$ | Li | 0.02                                           | 0.27 | -     | -    | -0.82 | -1.29                                                    | 0    | 0.96 | -     | -    | -0.91 |
|          | Na | -0.2                                           | 0.27 | -     | -    | -0.73 | -1.31                                                    | 0    | 0.92 | -     | -    | -0.89 |
|          | K  | -0.33                                          | 0.27 | -     | -    | -0.77 | -1.32                                                    | 0    | 0.91 | -     | -    | -0.93 |
| $T_{b2}$ | Li | 0.11                                           | 0.28 | -     | -    | -0.85 | -1.26                                                    | 0    | 0.96 | -     | -    | -0.91 |
|          | Na | -0.12                                          | 0.28 | -     | -    | -0.75 | -1.27                                                    | 0    | 0.92 | -     | -    | -0.89 |
|          | K  | -0.25                                          | 0.28 | -     | -    | -0.79 | -1.28                                                    | 0    | 0.91 | -     | -    | -0.92 |
| $H_{b1}$ | Li | -0.35                                          | 0.32 | -     | -    | -0.85 | -1.68                                                    | 0.37 | 0.94 | -     | -    | -0.91 |
|          | Na | -0.46                                          | 0.33 | -     | -    | -0.77 | -1.67                                                    | 0.37 | 0.91 | -     | -    | -0.88 |
|          | K  | -0.46                                          | 0.31 | -     | -    | -0.79 | -1.67                                                    | 0.37 | 0.89 | -     | -    | -0.92 |
| $H_{b2}$ | Li | -0.37                                          | 0.33 | -     | -    | -0.88 | -1.59                                                    | 0.40 | 0.93 | -     | -    | -0.9  |
|          | Na | -0.42                                          | 0.30 | -     | -    | -0.77 | -1.67                                                    | 0.41 | 0.89 | -     | -    | -0.9  |
|          | K  | -0.4                                           | 0.31 | -     | -    | -0.8  | -1.67                                                    | 0.38 | 0.88 | -     | -    | -0.93 |
| $H_m$    | Li | -                                              | -    | -1.16 | 0.79 | -0.9  | -                                                        | -    | -    | -1.16 | 0.76 | -0.91 |
|          | Na | -                                              | -    | -1.16 | 0.74 | -0.87 | -                                                        | -    | -    | -1.16 | 0.71 | -0.89 |
|          | K  | -                                              | -    | -1.16 | 0.72 | -0.9  | -                                                        | -    | -    | -1.14 | 0.7  | -0.92 |
| $T_m$    | Li | -                                              | -    | -1.15 | 0.78 | -0.89 | -                                                        | -    | -    | -1.13 | 0.76 | -0.9  |
|          | Na | -                                              | -    | -1.15 | 0.73 | -0.87 | -                                                        | -    | -    | -1.14 | 0.7  | -0.89 |
|          | K  | -                                              | -    | -1.15 | 0.7  | -0.85 | -                                                        | -    | -    | -1.14 | 0.68 | -0.91 |
| Top      | Li | -                                              | -    | -1.24 | 0.69 | -0.91 | -                                                        | -    | -    | -1.24 | 0.69 | -0.91 |
|          | Na | -                                              | -    | -1.27 | 0.69 | -0.87 | -                                                        | -    | -    | -1.27 | 0.67 | -0.87 |
|          | K  | -                                              | -    | -1.29 | 0.68 | -0.88 | -                                                        | -    | -    | -1.28 | 0.66 | -0.89 |
| In       | Li | -0.77                                          | -    | -1.13 | 0.8  | -0.88 | -1.68                                                    | -    | 0.96 | -1.45 | 0.65 | -0.89 |
|          | Na | -0.76                                          | -    | -1.13 | 0.82 | -0.83 | -1.54                                                    | -    | 0.93 | -1.54 | 0.69 | -0.86 |
|          | K  | -0.75                                          | -    | -1.13 | 0.81 | -0.83 | -1.3                                                     | -    | 0.89 | -1.48 | 0.67 | -0.92 |
